# Supplementary material for: Neoantigens recognized by T and B cells are generated by aberrant mRNA splicing in lupus neutrophils
Source: Research Square preprint supplement (doi:10.21203/rs.3.rs-7668471/v1), 2025-09-26
Supplement: Supplementary file 1 [file 04c84e2b418c0b27764f50fe.pdf]

# Supplemental material

## Neoantigens recognized by T and B cells are generated by aberrant mRNA splicing in lupus neutrophils

by

Rayan Najjar<sup>1,\*</sup>, Xiaoxing Wang<sup>1</sup>, Farheen Shaikh<sup>1</sup>, Ning Wang<sup>1</sup>, Ethan Le<sup>1</sup>, Jie An<sup>1</sup>, Cecilia Mustelin<sup>1</sup>,  
Fatemeh Moadab<sup>1</sup>, Vincent Gurchian<sup>1</sup>, Sadie J. Van den Bogaerde<sup>1</sup>, Stephen P. Schoenberger<sup>2</sup> & Tomas  
Mustelin<sup>1,\*</sup>

Suppl. Table S1. Patient data.

| id          | sex | SLEDAI | Age | Prednisone dose | Other medications | Major chronic comorbidities                                                         | ANA  | dsDNA | SSA  | SSB  | Sm   | Ribosomal P | RNP   |
|-------------|-----|--------|-----|-----------------|-------------------|-------------------------------------------------------------------------------------|------|-------|------|------|------|-------------|-------|
| SLE 1324.00 | M   | 2      | 42  | -               | hcq               | -                                                                                   | +    | -     | +    | -    |      | -           | -     |
| SLE 1422.00 | F   | 2      | 53  | -               | hcq               | history of breast cancer                                                            | +    | +     | -    | -    | -    | -           | -     |
| SLE 1419.00 | F   | 5      | 34  | -               | hcq               | -                                                                                   | +    | +     | +    | +    | +    | n.a.        | +     |
| SLE1016N    | M   | 2      | 58  | -               | hcq, mmf          | history of DVTs, dyslipidemia, peripheral vascular disease, coronary artery disease | +    | +     | -    | -    | -    | -           | -     |
| SLE1020N    | F   | 17     | 38  | -               | benlysta          | history of malignancy, inflammatory bowel disease                                   | +    | +     | +    | -    | -    | +           | -     |
| SLE1086N    | F   | 12     | 38  | 27.5mg          | hcq, aza          | -                                                                                   | +    | -     | -    | -    | +    | -           | +     |
| SLE1337N    | F   | 2      | 31  | -               | hcq               | -                                                                                   | +    | -     | -    | -    | -    | -           | -     |
| SLE1430N    | F   | 8      | 22  | 5mg             | hcq, aza          | -                                                                                   | n.a. | +     | n.a. | n.a. | +    | n.a.        | n.a.  |
| SLE1429N    | F   | 4      | 23  | -               | hcq, mmf          | Libman Sacks endocarditis                                                           | +    | +     | +    | -    | -    | -           | -     |
| SLE1301N    | F   | 12     | 65  | -               | hcq, mmf          | -                                                                                   | +    | +     | +    | -    | -    | +           | +     |
| SLE1445N    | F   | 0      | 74  | -               | hcq, aza          | -                                                                                   | -    | -     | +    | -    | -    | -           | -     |
| SLE1237N    | F   | 2      | 47  | -               | hcq, rtx          | -                                                                                   | +    | -     | +    | +    | +    | -           | indet |
| SLE1446N    | F   | 19     | 49  | -               | hcq, aza          | diabetes                                                                            | +    | -     | -    | -    | -    | -           | -     |
| SLE1073N    | F   | 9      | 28  | -               | hcq               | -                                                                                   | +    | +     | -    | -    | -    | -           | -     |
| SLE1448N    | F   | 4      | 40  | -               | hcq, mtx          | -                                                                                   | +    | +     | -    | -    | -    | n.a.        | -     |
| SLE 1223.00 | F   | 36     | 25  | 40mg            | -                 | shrinking lung, thyroid disease, history of DVT                                     | +    | +     | -    | -    | -    | -           | -     |
| SLE 1453.00 | F   | 4      | 27  | 2.5mg           | hcq, mmf          | -                                                                                   | +    | +     | +    | -    | +    | -           | -     |
| SLE 1455.00 | F   | 2      | 42  | -               | hcq, mtx          | -                                                                                   | +    | -     | -    | -    | -    | -           | +     |
| SLE 1456.00 | M   | 6      | 33  | 40mg            | hcq, mmf          | -                                                                                   | +    | +     | +    | -    | +    | indet       | +     |
| SLE 991.00  | F   | 2      | 36  | 3mg             | hcq, benlysta     | APS                                                                                 | +    | +     | +    | -    | -    | -           | -     |
| SLE 1225.00 | F   | 2      | 31  | -               | hcq, mmf          | -                                                                                   | +    | +     | -    | -    | -    | -           | -     |
| SLE 1195.00 | F   | 4      | 31  | -               | hcq, mtx          | -                                                                                   | +    | +     | +    | -    | +    | -           | +     |
| SLE 1245.00 | F   | 4      | 30  | -               | hcq               | -                                                                                   | +    | -     | -    | -    | +    | -           | +     |
| SLE 1466.00 | F   | 2      | 42  | -               | hcq               | -                                                                                   | +    | +     | -    | -    | +    | -           | indet |
| SLE 1136.00 | F   | 5      | 49  | 2.5mg           | hcq, tacrolimus   | -                                                                                   | +    | +     | +    | -    | +    | -           | -     |
| SLE 1107.00 | F   | 16     | 63  | -               | hcq               | -                                                                                   | +    | -     | -    | -    | -    | -           | -     |
| SLE 1477.00 | F   | 0      | 33  | -               | hcq               | -                                                                                   | +    | -     | +    | +    | -    | -           | -     |
| SLE 1232.00 | F   | 14     | 58  | -               | mtx               | diabetes, dyslipidemia                                                              | -    | -     | n.a. | n.a. | n.a. | n.a.        | n.a.  |
| SLE 1483.00 | F   | 12     | 33  | 10mg            | hcq, mmf          | -                                                                                   | +    | +     | +    | +    | -    | -           | -     |
| SLE 1063.00 | F   | 4      | 43  | -               | hcq               | -                                                                                   | +    | +     | +    | +    | -    | +           | -     |
| SLE 1485.00 | F   | 4      | 68  | 20mg            | chloroquine, rtx  | diabetes                                                                            | +    | -     | +    | -    | -    | -           | -     |
| SLE 1489.00 | F   | 4      | 47  | -               | hcq, mtx          | -                                                                                   | +    | +     | +    | -    | -    | -           | -     |
| SLE 1490.00 | F   | 4      | 26  | -               | hcq               | -                                                                                   | +    | -     | -    | -    | -    | -           | -     |
| SLE 1500.00 | F   | 1      | 32  | -               | hcq               | thyroid disease                                                                     | +    | +     | +    | -    | -    | -           | -     |
| SLE 1210.00 | F   | 4      | 65  | -               | hcq               | -                                                                                   | -    | -     | -    | -    | -    | -           | -     |

**Suppl. Table S2. MHC haplotype of the SLE patients.**

| SLE 1195                  | SLE 1210                  | SLE 1223                  | SLE 1225                   | SLE 1232      | SLE 1237                  |
|---------------------------|---------------------------|---------------------------|----------------------------|---------------|---------------------------|
| HLA-A*11:01               | HLA-A*26:01               | HLA-A*01:01               | HLA-A*11:01                | HLA-A*01:01   | HLA-A*03:01               |
| HLA-A*02:01               | HLA-A*02:01               | HLA-A*11:303              | HLA-A*02:05                | HLA-A*01:01   | HLA-A*02:01               |
| HLA-B*07:02               | HLA-B*15:01               | HLA-B*18:01               | HLA-B*18:01                | HLA-B*07:02   | HLA-B*27:05               |
| HLA-B*35:01               | HLA-B*38:01               | HLA-B*27:05               | HLA-B*18:01                | HLA-B*08:01   | HLA-B*14:02               |
| HLA-C*04:01               | HLA-C*12:03               | HLA-C*02:02               | HLA-C*04:30                | HLA-C*07:970N | HLA-C*08:02               |
| HLA-C*07:02               | HLA-C*03:03               | HLA-C*12:03               | HLA-C*12:03                | HLA-C*07:02   | HLA-C*01:02               |
| DPA1*01:03                | DPA1*01:03                | DPA1*01:03                | DPA1*01:03                 | DPA1*01:03    | DPA1*01:03                |
| DPA1*01:03                | DPA1*01:03                | DPA1*01:03                | DPA1*01:03                 | DPA1*01:03    | DPA1*02:01                |
| DPB1*04:01                | DPB1*06:01                | DPB1*04:01                | DPB1*104:01                | DQB1*06:04    | DPB1*14:01                |
| DPB1*02:01                | DPB1*04:02                | DPB1*04:01                | DPB1*02:01                 | DQB1*06:118   | DPB1*03:01                |
| DQB1*05:01                | DQB1*05:01                | DQA1*03:01                | DQB1*06:112N               | DRA*01:02     | DQA1*03:03                |
| DQB1*05:01                | DQB1*06:03                | DQA1*05:05                | DQB1*06:02                 | DRA*01:02     | DQA1*03:03                |
| DRA*01:01                 | DRA*01:01                 | DRA*01:01                 | DRA*01:01                  | DRB1*03:01    | DQB1*03:01                |
| DRA*01:01                 | DRA*01:01                 | DRA*01:01                 | DRA*01:02                  | DRB1*13:02    | DQB1*02:01                |
| DRB1*01:03                | DRB1*01:02                | DRB1*04:04                | DRB1*15:01                 |               | DRA*01:01                 |
| DRB1*01:01                | DRB1*13:01                | DRB1*11:01                | DRB1*11:02                 |               | DRA*01:01                 |
| DPA1*01:03-<br>DPB1*04:01 | DPA1*01:03-<br>DPB1*06:01 | DPA1*01:03-<br>DPB1*04:01 | DPA1*01:03-<br>DPB1*104:01 |               | DRB1*04:07                |
| DPA1*01:03-<br>DPB1*02:01 | DPA1*01:03-<br>DPB1*04:02 |                           | DPA1*01:03-<br>DPB1*02:01  |               | DRB1*03:01                |
|                           |                           |                           |                            |               | DRB3*02:02                |
|                           |                           |                           |                            |               | DRB3*02:02                |
|                           |                           |                           |                            |               | DPA1*01:03-<br>DPB1*14:01 |
|                           |                           |                           |                            |               | DPA1*01:03-<br>DPB1*03:01 |
|                           |                           |                           |                            |               | DPA1*02:01-<br>DPB1*14:01 |
|                           |                           |                           |                            |               | DPA1*02:01-<br>DPB1*03:01 |
|                           |                           |                           |                            |               | DQA1*03:03-<br>DQB1*03:01 |
|                           |                           |                           |                            |               | DQA1*03:03-<br>DQB1*02:01 |

| SLE 1016                   | SLE 1429                  | SLE 1430                  | SLE 1445                  | SLE 1446                   | SLE 1448                  | SLE 1453                  |
|----------------------------|---------------------------|---------------------------|---------------------------|----------------------------|---------------------------|---------------------------|
| HLA-A*02:01                | HLA-A*34:01               | HLA-A*24:02               | HLA-A*31:01               | HLA-A*01:01                | HLA-A*68:03               | HLA-A*33:03               |
| HLA-A*02:01                | HLA-A*03:01               | HLA-A*02:06               | HLA-A*11:01               | HLA-A*68:02                | HLA-A*02:06               | HLA-A*03:01               |
| HLA-B*07:02                | HLA-B*15:21               | HLA-B*35:14               | HLA-B*35:01               | HLA-B*49:01                | HLA-B*35:17               | HLA-B*58:01               |
| HLA-B*44:02                | HLA-B*07:02               | HLA-B*40:02               | HLA-B*27:05               | HLA-B*08:01                | HLA-B*39:05               | HLA-B*38:01               |
| HLA-C*07:631               | HLA-C*07:02               | HLA-C*04:01               | HLA-C*02:02               | HLA-C*07:01                | HLA-C*07:02               | HLA-C*03:02               |
| HLA-C*05:01                | HLA-C*04:03               | HLA-C*15:02               | HLA-C*04:01               | HLA-C*07:01                | HLA-C*04:01               | HLA-C*12:03               |
| DPA1*02:01                 | DPA1*02:02                | DPA1*01:03                | DPA1*01:03                | DPA1*01:04                 | DPA1*01:03                | DPA1*02:02                |
| DPA1*01:03                 | DPA1*01:03                | DPA1*01:03                | DPA1*01:03                | DPA1*02:01                 | DPA1*01:03                | DPA1*01:03                |
| DPB1*01:01                 | DPB1*01:01                | DPB1*04:01                | DPB1*04:02                | DPB1*15:01                 | DPB1*04:02                | DPB1*02:01                |
| DPB1*03:01                 | DPB1*16:01                | DPB1*04:02                | DPB1*04:02                | DPB1*01:01                 | DPB1*04:02                | DPB1*05:01                |
| DQA1*01:02                 | DQA1*01:02                | DQB1*03:01                | DQA1*03:02                | DQA1*05:01                 | DRA*01:01                 | DQA1*02:01                |
| DQA1*05:01                 | DQA1*01:02                | DQB1*03:92                | DQA1*01:01                | DQA1*01:02                 | DRA*01:02                 | DQA1*01:03                |
| DQB1*06:04                 | DQB1*05:02                | DRA*01:01                 | DQB1*05:01                | DQB1*06:04                 | DRB1*08:02                | DQB1*06:01                |
| DQB1*06:118                | DQB1*06:02                | DRA*01:02                 | DQB1*03:03                | DQB1*06:118                | DRB1*04:07                | DQB1*02:02                |
| DRA*01:02                  | DRA*01:01                 | DRB1*16:02                | DRA*01:01                 | DRA*01:01                  | DPA1*01:03-<br>DPB1*04:02 | DRA*01:01                 |
| DRA*01:02                  | DRA*01:02                 | DRB1*14:06                | DRA*01:01                 | DRA*01:02                  |                           | DRA*01:03                 |
| DRB1*03:01                 | DRB1*15:02                | DRB5*02:02                | DRB1*09:01                | DRB1*03:01                 |                           | DRB1*07:01                |
| DRB1*13:02                 | DRB1*15:01                | DRB5*02:02                | DRB1*01:01                | DRB1*13:02                 |                           | DRB1*08:03                |
| DRB3*03:01                 | DRB5*01:01                | DPA1*01:03-<br>DPB1*04:01 | DPA1*01:03-<br>DPB1*04:02 | DRB3*03:01                 |                           | DPA1*02:02-<br>DPB1*02:01 |
| DRB3*01:01                 | DRB5*01:01                | DPA1*01:03-<br>DPB1*04:02 | DQA1*03:02-<br>DQB1*05:01 | DRB3*01:01                 |                           | DPA1*02:02-<br>DPB1*05:01 |
| DPA1*02:01-<br>DPB1*01:01  | DPA1*02:02-<br>DPB1*01:01 |                           | DQA1*03:02-<br>DQB1*03:03 | DPA1*01:04-<br>DPB1*15:01  |                           | DPA1*01:03-<br>DPB1*02:01 |
| DPA1*02:01-<br>DPB1*03:01  | DPA1*02:02-<br>DPB1*16:01 |                           | DQA1*01:01-<br>DQB1*05:01 | DPA1*01:04-<br>DPB1*01:01  |                           | DPA1*01:03-<br>DPB1*05:01 |
| DPA1*01:03-<br>DPB1*01:01  | DPA1*01:03-<br>DPB1*01:01 |                           | DQA1*01:01-<br>DQB1*03:03 | DPA1*02:01-<br>DPB1*15:01  |                           | DQA1*02:01-<br>DQB1*06:01 |
| DPA1*01:03-<br>DPB1*03:01  | DPA1*01:03-<br>DPB1*16:01 |                           |                           | DPA1*02:01-<br>DPB1*01:01  |                           | DQA1*02:01-<br>DQB1*02:02 |
| DQA1*01:02-<br>DQB1*06:04  | DQA1*01:02-<br>DQB1*05:02 |                           |                           | DQA1*05:01-<br>DQB1*06:04  |                           | DQA1*01:03-<br>DQB1*06:01 |
| DQA1*01:02-<br>DQB1*06:118 | DQA1*01:02-<br>DQB1*06:02 |                           |                           | DQA1*05:01-<br>DQB1*06:118 |                           | DQA1*01:03-<br>DQB1*02:02 |
| DQA1*05:01-<br>DQB1*06:04  |                           |                           |                           | DQA1*01:02-<br>DQB1*06:04  |                           |                           |
| DQA1*05:01-<br>DQB1*06:118 |                           |                           |                           | DQA1*01:02-<br>DQB1*06:118 |                           |                           |

| SLE 1455                  | SLE 1456    | SLE 1466      | SLE 1477                  | SLE 1483                  | SLE 1485                  |
|---------------------------|-------------|---------------|---------------------------|---------------------------|---------------------------|
| HLA-A*02:686              | HLA-A*02:06 | HLA-A*01:01   | HLA-A*02:11               | HLA-A*01:01               | HLA-A*25:01               |
| HLA-A*01:01               | HLA-A*11:01 | HLA-A*01:01   | HLA-A*68:02               | HLA-A*02:01               | HLA-A*02:01               |
| HLA-B*08:143              | HLA-B*38:02 | HLA-B*37:01   | HLA-B*35:49               | HLA-B*08:01               | HLA-B*18:01               |
| HLA-B*51:01               | HLA-B*40:01 | HLA-B*08:01   | HLA-B*15:09               | HLA-B*08:01               | HLA-B*18:01               |
| HLA-C*07:01               | HLA-C*07:02 | HLA-C*07:1000 | HLA-C*04:01               | HLA-C*07:01               | HLA-C*07:01               |
| HLA-C*04:01               | HLA-C*03:04 | HLA-C*06:02   | HLA-C*07:04               | HLA-C*07:01               | HLA-C*12:03               |
| DPA1*02:01                | DQB1*05:01  | DPA1*01:03    | DPA1*01:03                | DPA1*01:03                | DPA1*01:03                |
| DPA1*02:01                | DQB1*05:01  | DPA1*01:03    | DPA1*01:03                | DPA1*01:03                | DPA1*01:03                |
| DPB1*13:01                | DRA*01:01   | DRA*01:01     | DPB1*04:01                | DPB1*04:01                | DPB1*02:01                |
| DPB1*01:01                | DRA*01:02   | DRA*01:02     | DPB1*04:02                | DPB1*04:01                | DPB1*23:01                |
| DRA*01:01                 | DRB1*04:03  | DRB1*03:01    | DQB1*03:92                | DQB1*06:02                | DQB1*06:02                |
| DRA*01:02                 | DRB1*15:02  | DRB1*04:01    | DQB1*03:01                | DQB1*06:02                | DQB1*06:02                |
| DRB1*03:01                |             |               | DRA*01:01                 | DRA*01:02                 | DRA*01:02                 |
| DRB1*04:02                |             |               | DRA*01:02                 | DRA*01:02                 | DRA*01:02                 |
| DPA1*02:01-<br>DPB1*13:01 |             |               | DRB1*16:02                | DRB1*03:01                | DRB1*15:01                |
| DPA1*02:01-<br>DPB1*01:01 |             |               | DRB1*11:01                | DRB1*15:01                | DRB1*08:01                |
|                           |             |               | DRB3*02:02                | DRB5*01:01                | DRB5*01:01                |
|                           |             |               | DRB3*02:02                | DRB5*01:01                | DRB5*01:01                |
|                           |             |               | DRB5*02:02                | DPA1*01:03-<br>DPB1*04:01 | DPA1*01:03-<br>DPB1*02:01 |
|                           |             |               | DRB5*02:02                |                           | DPA1*01:03-<br>DPB1*23:01 |
|                           |             |               | DPA1*01:03-<br>DPB1*04:01 |                           |                           |
|                           |             |               | DPA1*01:03-<br>DPB1*04:02 |                           |                           |

| SLE 1020                   | SLE 1063                  | SLE 1073                    | SLE 1086                   | SLE 1107                  | SLE 1136                   |
|----------------------------|---------------------------|-----------------------------|----------------------------|---------------------------|----------------------------|
| HLA-A*30:01                | HLA-A*23:01               | HLA-A*01:01                 | HLA-A*23:01                | HLA-A*01:01               | HLA-A*02:01                |
| HLA-A*31:01                | HLA-A*32:01               | HLA-A*68:01                 | HLA-A*24:02                | HLA-A*01:01               | HLA-A*68:03                |
| HLA-B*13:02                | HLA-B*07:02               | HLA-B*39:01                 | HLA-B*15:03                | HLA-B*08:01               | HLA-B*35:01                |
| HLA-B*52:01                | HLA-B*07:02               | HLA-B*08:01                 | HLA-B*45:01                | HLA-B*14:02               | HLA-B*35:01                |
| HLA-C*06:02                | HLA-C*07:02               | HLA-C*07:01                 | HLA-C*06:02                | HLA-C*07:970N             | HLA-C*07:02                |
| HLA-C*03:03                | HLA-C*15:05               | HLA-C*12:03                 | HLA-C*02:10                | HLA-C*08:02               | HLA-C*04:01                |
| DPA1*02:01                 | DPA1*02:01                | DPA1*02:01                  | DPA1*02:01                 | DPA1*01:03                | DPA1*01:03                 |
| DPA1*01:03                 | DPA1*01:03                | DPA1*01:03                  | DPA1*01:03                 | DPA1*01:03                | DPA1*01:03                 |
| DPB1*14:01                 | DPB1*01:01                | DPB1*01:01                  | DPB1*18:01                 | DPB1*04:01                | DPB1*677:01                |
| DPB1*04:01                 | DPB1*04:02                | DPB1*04:01                  | DPB1*11:01                 | DPB1*04:01                | DPB1*04:01                 |
| DQA1*03:03                 | DQB1*06:113               | DQA1*01:03                  | DQA1*02:01                 | DQB1*05:01                | DRA*01:02                  |
| DQA1*01:02                 | DQB1*06:02                | DQA1*05:01                  | DQA1*01:02                 | DQB1*05:01                | DRA*01:02                  |
| DQB1*06:04                 | DRA*01:02                 | DQB1*06:112N                | DQB1*06:114                | DRA*01:01                 | DRB1*08:02                 |
| DQB1*06:118                | DRA*01:02                 | DQB1*06:03                  | DQB1*06:02                 | DRA*01:01                 | DRB1*08:02                 |
| DRA*01:01                  | DRB1*03:01                | DRA*01:01                   | DRA*01:01                  | DRB1*01:03                | DPA1*01:03-<br>DPB1*677:01 |
| DRA*01:02                  | DRB1*15:01                | DRA*01:02                   | DRA*01:01                  | DRB1*04:01                | DPA1*01:03-<br>DPB1*04:01  |
| DRB1*04:11                 | DRB5*01:01                | DRB1*03:01                  | DRB1*15:03                 | DPA1*01:03-<br>DPB1*04:01 |                            |
| DRB1*13:02                 | DRB5*01:01                | DRB1*13:01                  | DRB1*07:01                 |                           |                            |
| DRB3*03:01                 | DPA1*02:01-<br>DPB1*01:01 | DRB3*01:01                  | DRB5*01:01                 |                           |                            |
| DRB3*03:01                 | DPA1*02:01-<br>DPB1*04:02 | DRB3*02:02                  | DRB5*01:01                 |                           |                            |
| DPA1*02:01-<br>DPB1*14:01  | DPA1*01:03-<br>DPB1*01:01 | DPA1*02:01-<br>DPB1*01:01   | DPA1*02:01-<br>DPB1*18:01  |                           |                            |
| DPA1*02:01-<br>DPB1*04:01  | DPA1*01:03-<br>DPB1*04:02 | DPA1*02:01-<br>DPB1*04:01   | DPA1*02:01-<br>DPB1*11:01  |                           |                            |
| DPA1*01:03-<br>DPB1*14:01  |                           | DPA1*01:03-<br>DPB1*01:01   | DPA1*01:03-<br>DPB1*18:01  |                           |                            |
| DPA1*01:03-<br>DPB1*04:01  |                           | DPA1*01:03-<br>DPB1*04:01   | DPA1*01:03-<br>DPB1*11:01  |                           |                            |
| DQA1*03:03-<br>DQB1*06:04  |                           | DQA1*01:03-<br>DQB1*06:112N | DQA1*02:01-<br>DQB1*06:114 |                           |                            |
| DQA1*03:03-<br>DQB1*06:118 |                           | DQA1*01:03-<br>DQB1*06:03   | DQA1*02:01-<br>DQB1*06:02  |                           |                            |
| DQA1*01:02-<br>DQB1*06:04  |                           | DQA1*05:01-<br>DQB1*06:112N | DQA1*01:02-<br>DQB1*06:114 |                           |                            |
| DQA1*01:02-<br>DQB1*06:118 |                           | DQA1*05:01-<br>DQB1*06:03   | DQA1*01:02-<br>DQB1*06:02  |                           |                            |

| SLE 1245                  | SLE 1301                  | SLE 1324                  | SLE 1337                  | SLE 1419                  | SLE 1422                  |
|---------------------------|---------------------------|---------------------------|---------------------------|---------------------------|---------------------------|
| HLA-A*01:01               | HLA-A*31:01               | HLA-A*24:02               | HLA-A*02:01               | HLA-A*02:01               | HLA-A*33:01               |
| HLA-A*03:01               | HLA-A*11:01               | HLA-A*31:01               | HLA-A*02:01               | HLA-A*11:01               | HLA-A*02:01               |
| HLA-B*38:01               | HLA-B*35:01               | HLA-B*51:01               | HLA-B*15:01               | HLA-B*51:01               | HLA-B*14:02               |
| HLA-B*15:01               | HLA-B*27:05               | HLA-B*13:02               | HLA-B*18:01               | HLA-B*13:01               | HLA-B*52:01               |
| HLA-C*03:03               | HLA-C*02:02               | HLA-C*14:02               | HLA-C*07:01               | HLA-C*03:04               | HLA-C*08:02               |
| HLA-C*12:03               | HLA-C*04:01               | HLA-C*06:02               | HLA-C*03:04               | HLA-C*14:02               | HLA-C*03:03               |
| DPA1*02:01                | DPA1*01:03                | DPA1*01:03                | DPA1*01:03                | DPA1*02:02                | DPA1*02:02                |
| DPA1*01:03                | DPA1*01:03                | DPA1*01:03                | DPA1*01:03                | DPA1*02:01                | DPA1*01:03                |
| DPB1*04:01                | DPB1*04:02                | DPB1*02:01                | DPB1*04:01                | DPB1*14:01                | DPB1*05:01                |
| DPB1*14:01                | DPB1*04:02                | DPB1*04:02                | DPB1*04:01                | DPB1*05:01                | DPB1*04:02                |
| DQA1*01:10                | DQA1*03:02                | DQA1*04:01                | DQA1*05:05                | DQA1*06:01                | DQA1*03:01                |
| DQA1*01:01                | DQA1*01:01                | DQA1*02:01                | DQA1*03:01                | DQA1*03:02                | DQA1*01:01                |
| DQB1*05:01                | DQB1*05:01                | DRA*01:01                 | DQB1*03:02                | DQB1*03:01                | DQB1*05:01                |
| DQB1*06:03                | DQB1*03:03                | DRA*01:02                 | DQB1*03:01                | DQB1*03:03                | DQB1*03:02                |
| DRA*01:01                 | DRA*01:01                 | DRB1*08:02                | DRA*01:01                 | DRA*01:01                 | DRA*01:01                 |
| DRA*01:02                 | DRA*01:01                 | DRB1*07:01                | DRA*01:01                 | DRA*01:02                 | DRA*01:01                 |
| DRB1*01:03                | DRB1*09:01                | DPA1*01:03-<br>DPB1*02:01 | DRB1*04:01                | DRB1*12:02                | DRB1*01:02                |
| DRB1*13:01                | DRB1*01:01                | DPA1*01:03-<br>DPB1*04:02 | DRB1*11:04                | DRB1*09:01                | DRB1*04:11                |
| DRB3*01:01                | DPA1*01:03-<br>DPB1*04:02 |                           | DRB3*02:02                | DRB3*03:01                | DPA1*02:02-<br>DPB1*05:01 |
| DRB3*01:01                | DQA1*03:02-<br>DQB1*05:01 |                           | DRB3*02:02                | DRB3*03:01                | DPA1*02:02-<br>DPB1*04:02 |
| DPA1*02:01-<br>DPB1*04:01 | DQA1*03:02-<br>DQB1*03:03 |                           | DPA1*01:03-<br>DPB1*04:01 | DPA1*02:02-<br>DPB1*14:01 | DPA1*01:03-<br>DPB1*05:01 |
| DPA1*02:01-<br>DPB1*14:01 | DQA1*01:01-<br>DQB1*05:01 |                           | DQA1*05:05-<br>DQB1*03:02 | DPA1*02:02-<br>DPB1*05:01 | DPA1*01:03-<br>DPB1*04:02 |
| DPA1*01:03-<br>DPB1*04:01 | DQA1*01:01-<br>DQB1*03:03 |                           | DQA1*05:05-<br>DQB1*03:01 | DPA1*02:01-<br>DPB1*14:01 | DQA1*03:01-<br>DQB1*05:01 |
| DPA1*01:03-<br>DPB1*14:01 |                           |                           | DQA1*03:01-<br>DQB1*03:02 | DPA1*02:01-<br>DPB1*05:01 | DQA1*03:01-<br>DQB1*03:02 |
| DQA1*01:10-<br>DQB1*05:01 |                           |                           | DQA1*03:01-<br>DQB1*03:01 | DQA1*06:01-<br>DQB1*03:01 | DQA1*01:01-<br>DQB1*05:01 |
| DQA1*01:10-<br>DQB1*06:03 |                           |                           |                           | DQA1*06:01-<br>DQB1*03:03 | DQA1*01:01-<br>DQB1*03:02 |
| DQA1*01:01-<br>DQB1*05:01 |                           |                           |                           | DQA1*03:02-<br>DQB1*03:01 |                           |
| DQA1*01:01-<br>DQB1*06:03 |                           |                           |                           | DQA1*03:02-<br>DQB1*03:03 |                           |

| SLE 1489                  | SLE 1490                  | SLE 1500    | SLE 991                     |
|---------------------------|---------------------------|-------------|-----------------------------|
| HLA-A*11:303              | HLA-A*02:01               | HLA-A*24:02 | HLA-A*32:01                 |
| HLA-A*02:11               | HLA-A*02:01               | HLA-A*02:01 | HLA-A*01:01                 |
| HLA-B*40:10               | HLA-B*18:01               | HLA-B*39:06 | HLA-B*40:01                 |
| HLA-B*40:06               | HLA-B*07:02               | HLA-B*48:01 | HLA-B*38:01                 |
| HLA-C*15:02               | HLA-C*07:02               | HLA-C*08:03 | HLA-C*07:01                 |
| HLA-C*04:03               | HLA-C*07:01               | HLA-C*07:02 | HLA-C*03:04                 |
| DPA1*02:01                | DPA1*02:02                | DRA*01:01   | DPA1*01:03                  |
| DPA1*02:02                | DPA1*01:03                | DRA*01:01   | DPA1*01:03                  |
| DPB1*01:01                | DPB1*04:01                | DRB1*04:07  | DPB1*04:01                  |
| DPB1*13:01                | DPB1*05:01                | DRB1*09:01  | DPB1*02:01                  |
| DQB1*05:02                | DQB1*06:02                |             | DQA1*01:03                  |
| DQB1*06:03                | DQB1*03:01                |             | DQA1*03:01                  |
| DRA*01:01                 | DRA*01:02                 |             | DQB1*06:03                  |
| DRA*01:02                 | DRA*01:02                 |             | DQB1*06:112N                |
| DRB1*15:02                | DRB1*15:01                |             | DRA*01:01                   |
| DRB1*13:01                | DRB1*12:01                |             | DRA*01:02                   |
| DRB5*01:01                | DRB3*02:02                |             | DRB1*04:01                  |
| DRB5*01:01                | DRB3*02:02                |             | DRB1*13:01                  |
| DPA1*02:01-<br>DPB1*01:01 | DRB5*01:01                |             | DRB3*01:01                  |
| DPA1*02:01-<br>DPB1*13:01 | DRB5*01:01                |             | DRB3*01:01                  |
| DPA1*02:02-<br>DPB1*01:01 | DPA1*02:02-<br>DPB1*04:01 |             | DPA1*01:03-<br>DPB1*04:01   |
| DPA1*02:02-<br>DPB1*13:01 | DPA1*02:02-<br>DPB1*05:01 |             | DPA1*01:03-<br>DPB1*02:01   |
|                           | DPA1*01:03-<br>DPB1*04:01 |             | DQA1*01:03-<br>DQB1*06:03   |
|                           | DPA1*01:03-<br>DPB1*05:01 |             | DQA1*01:03-<br>DQB1*06:112N |
|                           |                           |             | DQA1*03:01-<br>DQB1*06:03   |
|                           |                           |             | DQA1*03:01-<br>DQB1*06:112N |

**Suppl. Table S3. All p-values for panels g and h in Fig. 5.**

Tcell\_activation\_stats\_CD4\_CD8

| Stim     | Activated_CD4 | Total_CD4 | Activated_CD8 | Total_CD8 | Chi_CD4_Fpadj        | Chi_CD8_padj         |
|----------|---------------|-----------|---------------|-----------|----------------------|----------------------|
| IF44-1   | 886           | 17059     | 477           | 10541     | 1.23019563409832E-49 | 3.13703358289728E-33 |
| IFI44L-1 | 236           | 13949     | 254           | 10396     | 0.00888340909127954  | 0.000511882246753642 |
| IFI44L-2 | 466           | 11169     | 328           | 9812      | 7.73351080455585E-22 | 2.02470860282823E-13 |
| MX1-1    | 277           | 12745     | 232           | 9274      | 0.931323111652439    | 0.000283566250395503 |
| MX1-2    | 275           | 11410     | 221           | 8730      | 0.212678580116946    | 0.000216226366359737 |
| MX1-3_1  | 207           | 9604      | 197           | 8996      | 0.980192791641372    | 0.0332045883905966   |
| MX1-3_2  | 568           | 21430     | 246           | 9367      | 0.00378623905393877  | 2.84117618837999E-05 |
| MX1-4    | 308           | 11528     | 273           | 9280      | 0.00888340909127954  | 3.02684056461585E-08 |
| MX1-5    | 342           | 14158     | 243           | 9386      | 0.183447774242871    | 5.73066982785197E-05 |
| OAS1-1   | 360           | 16281     | 218           | 9761      | 0.794476450639903    | 0.0165594282409951   |
| OAS1-2   | 170           | 14658     | 169           | 9049      | 5.73419938238872E-11 | 0.569323605242885    |
| RSAD2-1  | 305           | 16078     | 178           | 9417      | 0.184336870297428    | 0.499887173395512    |
| RSAD2-2  | 332           | 14920     | 244           | 8448      | 0.788572730709479    | 1.88371100096388E-07 |
| TBC1D15  | 293           | 11747     | 262           | 8432      | 0.0913237205582633   | 9.76625836814958E-10 |
| IFIT1    | 509           | 19281     | 285           | 10556     | 0.00547079444494672  | 3.14071554771974E-06 |
| RSAD2-3  | 362           | 13692     | 232           | 9318      | 0.00888340909127954  | 0.000329414746646229 |
| SERPING1 | 339           | 9823      | 224           | 7760      | 3.88893008185145E-10 | 3.02448392189273E-07 |
| IFI44L-3 | 357           | 13919     | 307           | 8719      | 0.0279499914585584   | 5.04420448734645E-15 |
| FCGRT_1  | 127           | 13582     | 131           | 8810      | 6.03552132177342E-16 | 0.185872067136131    |
| FCGRT_2  | 208           | 12518     | 204           | 8833      | 0.0078671847922347   | 0.00692817815777953  |
| FCGRT_3  | 295           | 14260     | 209           | 8666      | 0.794476450639903    | 0.0015478110865489   |
| FCGRT_4  | 155           | 13819     | 137           | 9096      | 2.24308179926397E-11 | 0.214291213813226    |
| ABCG1_1  | 334           | 15777     | 276           | 9616      | 0.931323111652439    | 1.28623465403876E-07 |
| ABCG1_2  | 274           | 13691     | 302           | 8859      | 0.524539629117833    | 1.11689490680431E-13 |
| ABCG1_3  | 86            | 11803     | 128           | 8212      | 2.12453627693638E-20 | 0.35367481504016     |
| ABCG1_4  | 147           | 13807     | 134           | 8407      | 1.21243702708608E-12 | 0.435790656638094    |
| OAS3_1   | 155           | 12032     | 169           | 8542      | 2.23169658239002E-07 | 0.301842545134272    |
| OAS3_2   | 364           | 15582     | 204           | 8617      | 0.35082322863239     | 0.00312198224737477  |
| OAS3_3   | 306           | 15396     | 259           | 9070      | 0.461019860102735    | 2.25685789038616E-07 |
| OAS3_4   | 222           | 18433     | 261           | 10446     | 2.24308179926397E-11 | 0.000216226366359737 |
| OAS3_5   | 321           | 15209     | 152           | 9595      | 0.931323111652439    | 0.393689117542041    |



Supplemental Fig. S1

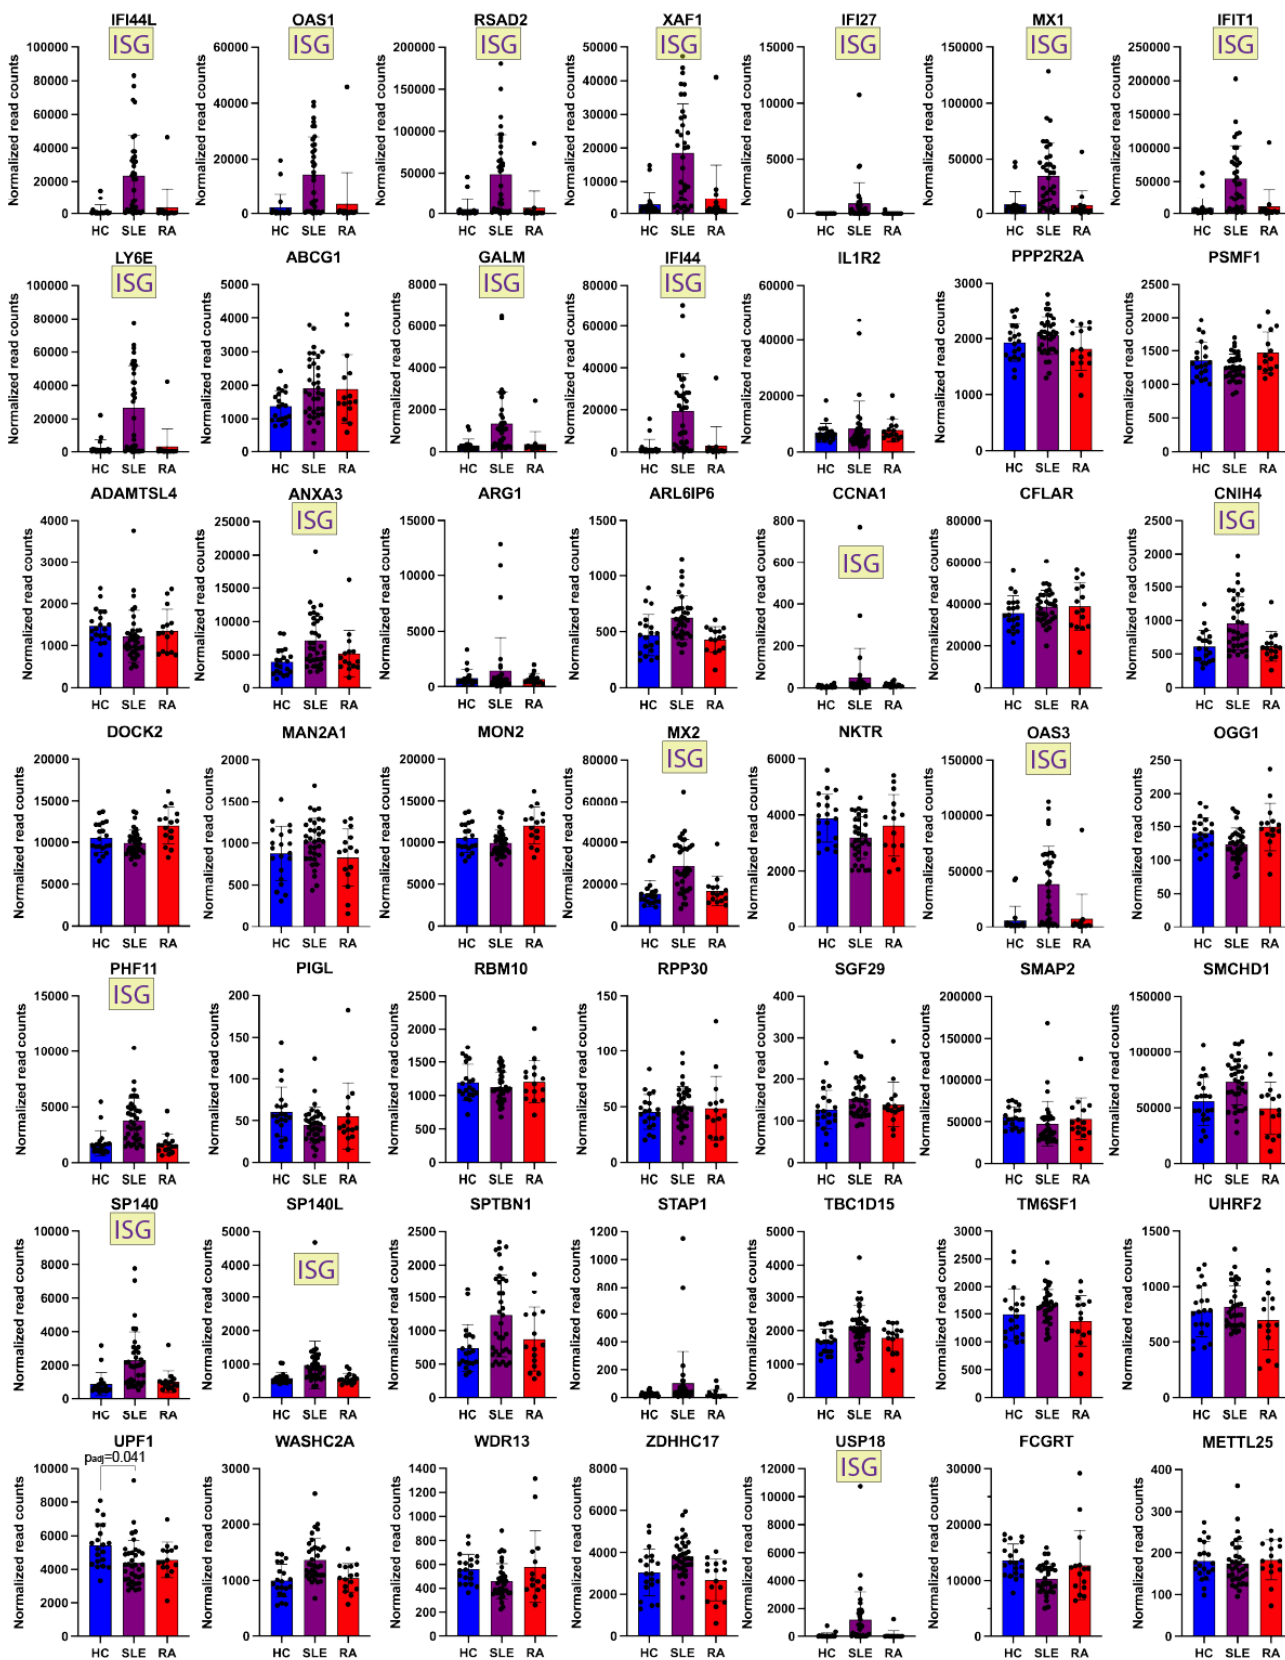

**Suppl. Fig. S1 | Expression of the top genes (as in Fig. 1h, plus 3) whose transcripts are subjected to cryptic splicing in SLE neutrophils.** Read counts from the same RNAseq of neutrophils used for the analysis of cryptic splicing in 20 healthy controls (HC; blue bars), 35 SLE patients (purple bars), and 15 RA patients (red bars). ISG, interferon-inducible gene.

Supplemental Fig. S2

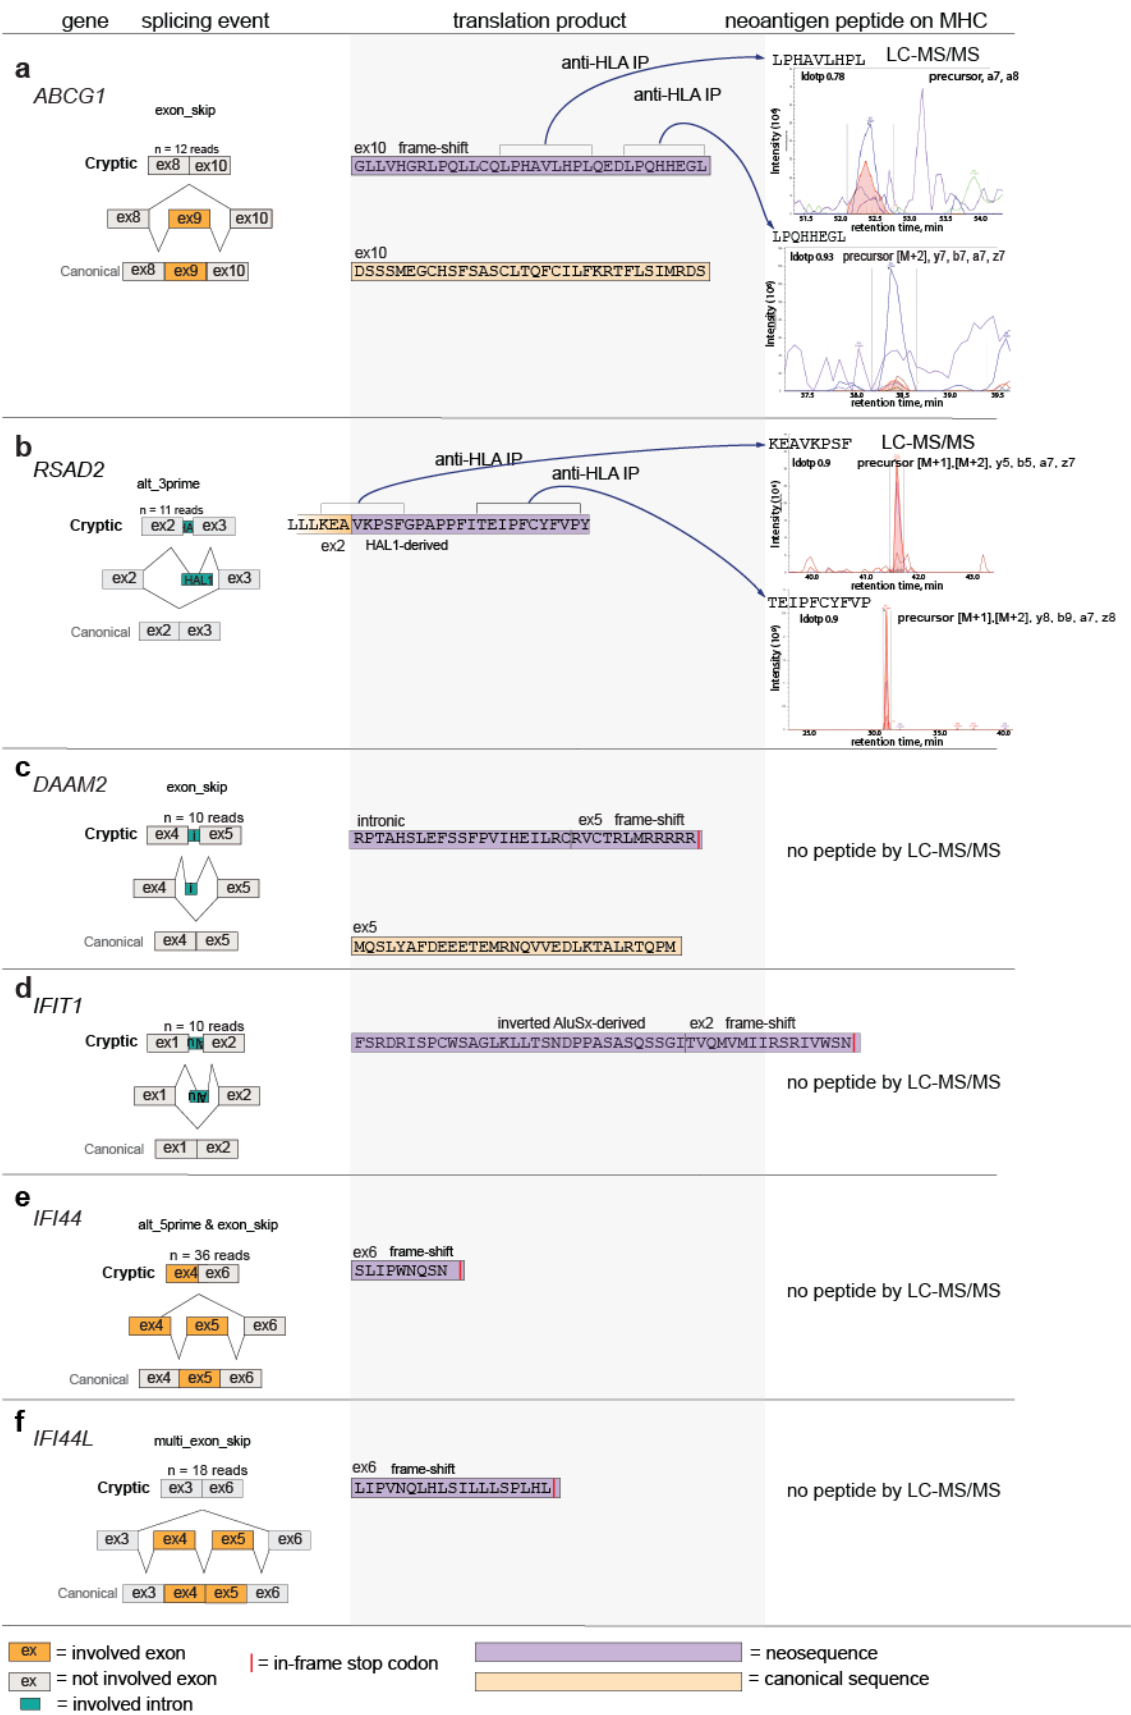

Suppl. Fig. S2 | Six additional examples of cryptic splicing events, some of which produced neoantigen peptides detected on HLA. Representation same as in Fig. 3.

Supplemental Fig. S3

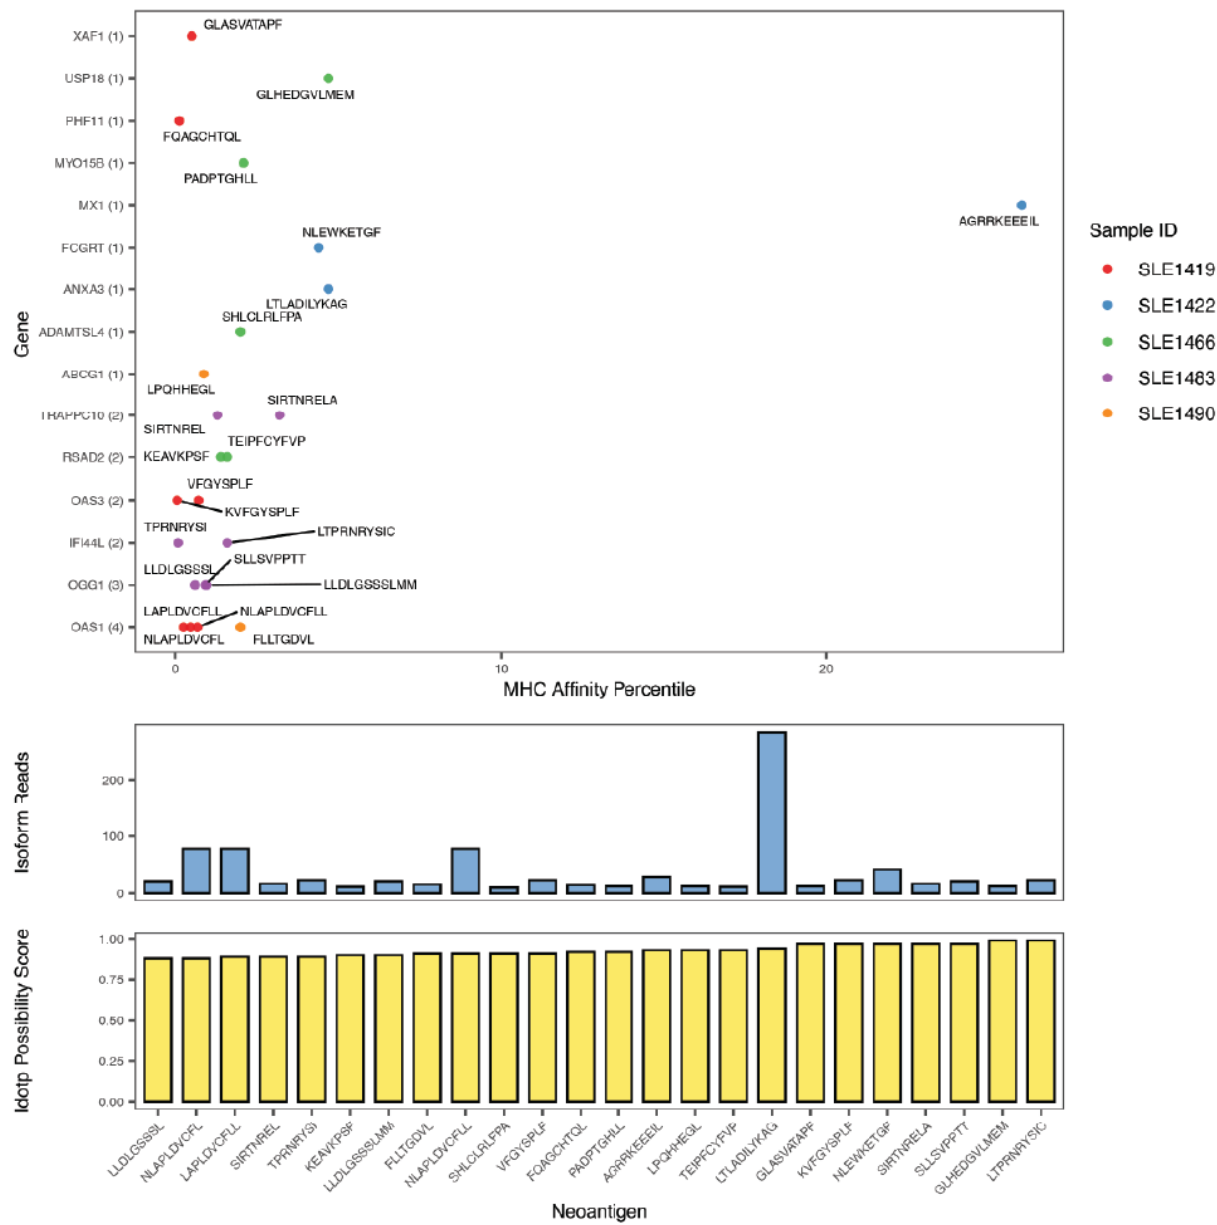

**Suppl. Fig. S3 | Predicted affinities of the neoantigen peptides identified by immunopeptidomics for the class I MHC alleles unique to each patient.** Top panel, the affinities by which the detected peptides are predicted to bind the patients MHC allele. Note that only the AGRRKEEEIL peptide derived from a cryptic splice event in MX1 is predicted to have a lower affinity of binding. Middle panel, read counts for the cryptic splice isoforms that generated these peptides. Bottom panel, the sequences and idop values for each peptide.



Supplemental Fig. S4

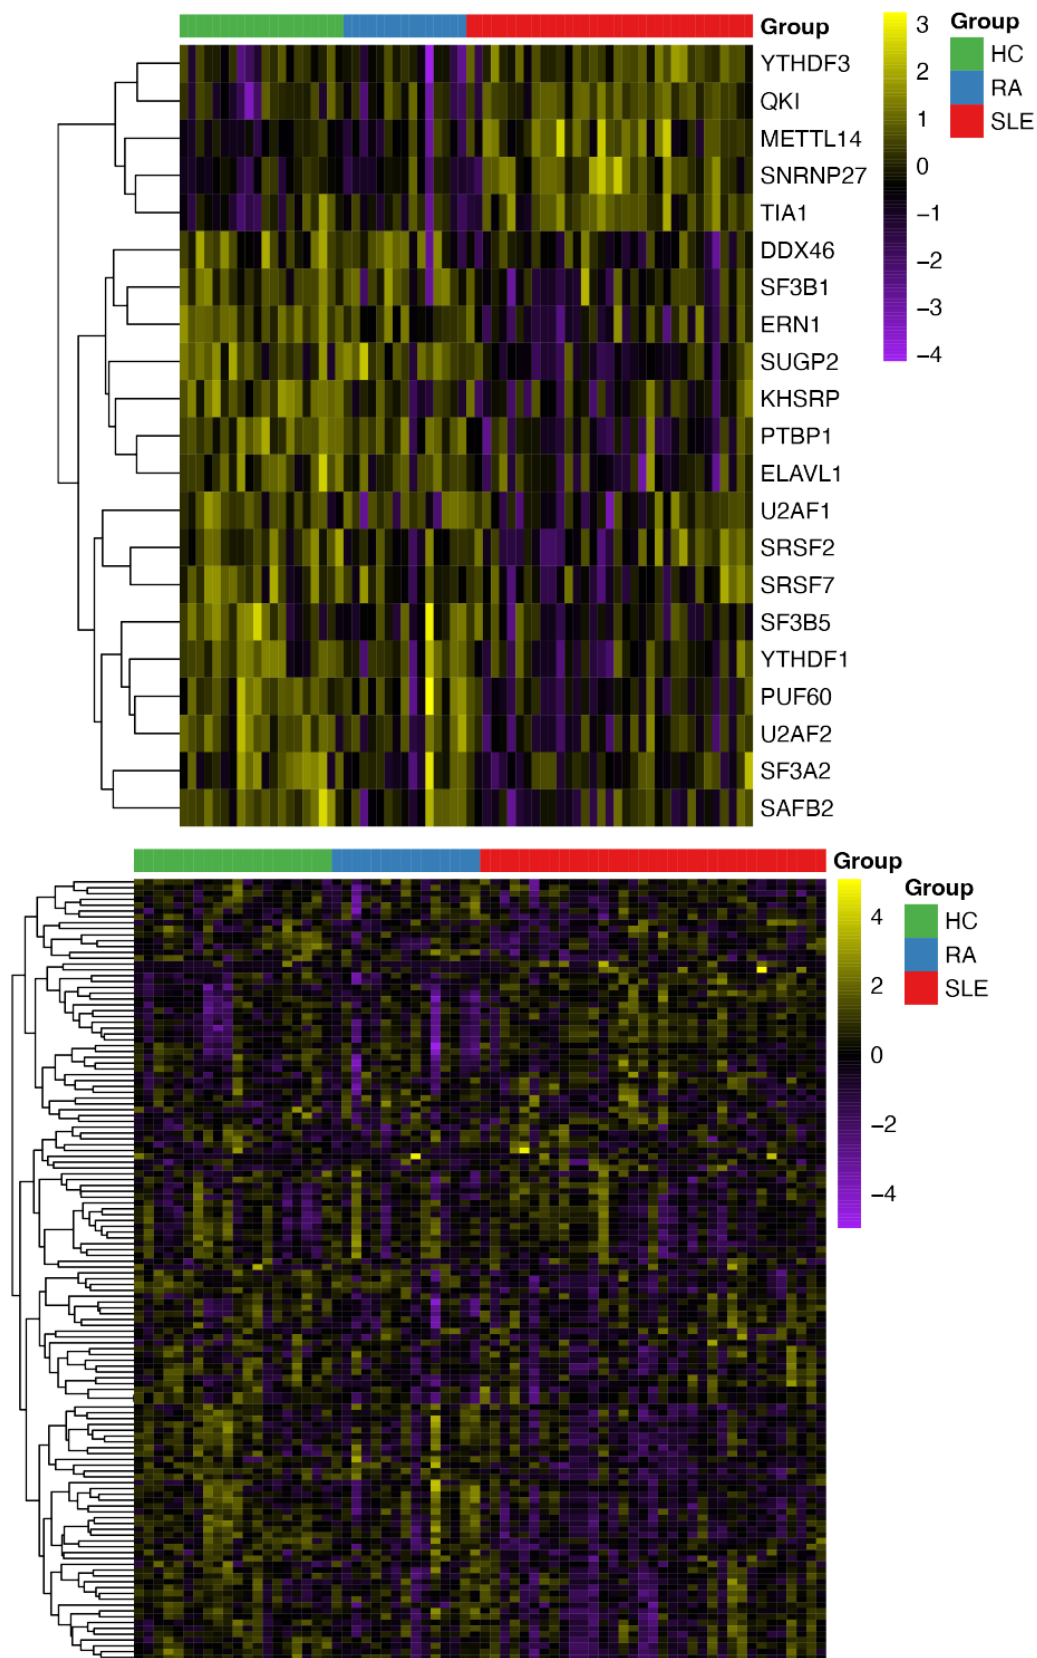

Suppl. Fig. S4 | Heat maps of expression of spliceosome components and mRNA splicing factors. Top, the statistically significantly altered genes. Bottom, all spliceosome components and mRNA splicing factors.

Supplemental Fig. S5

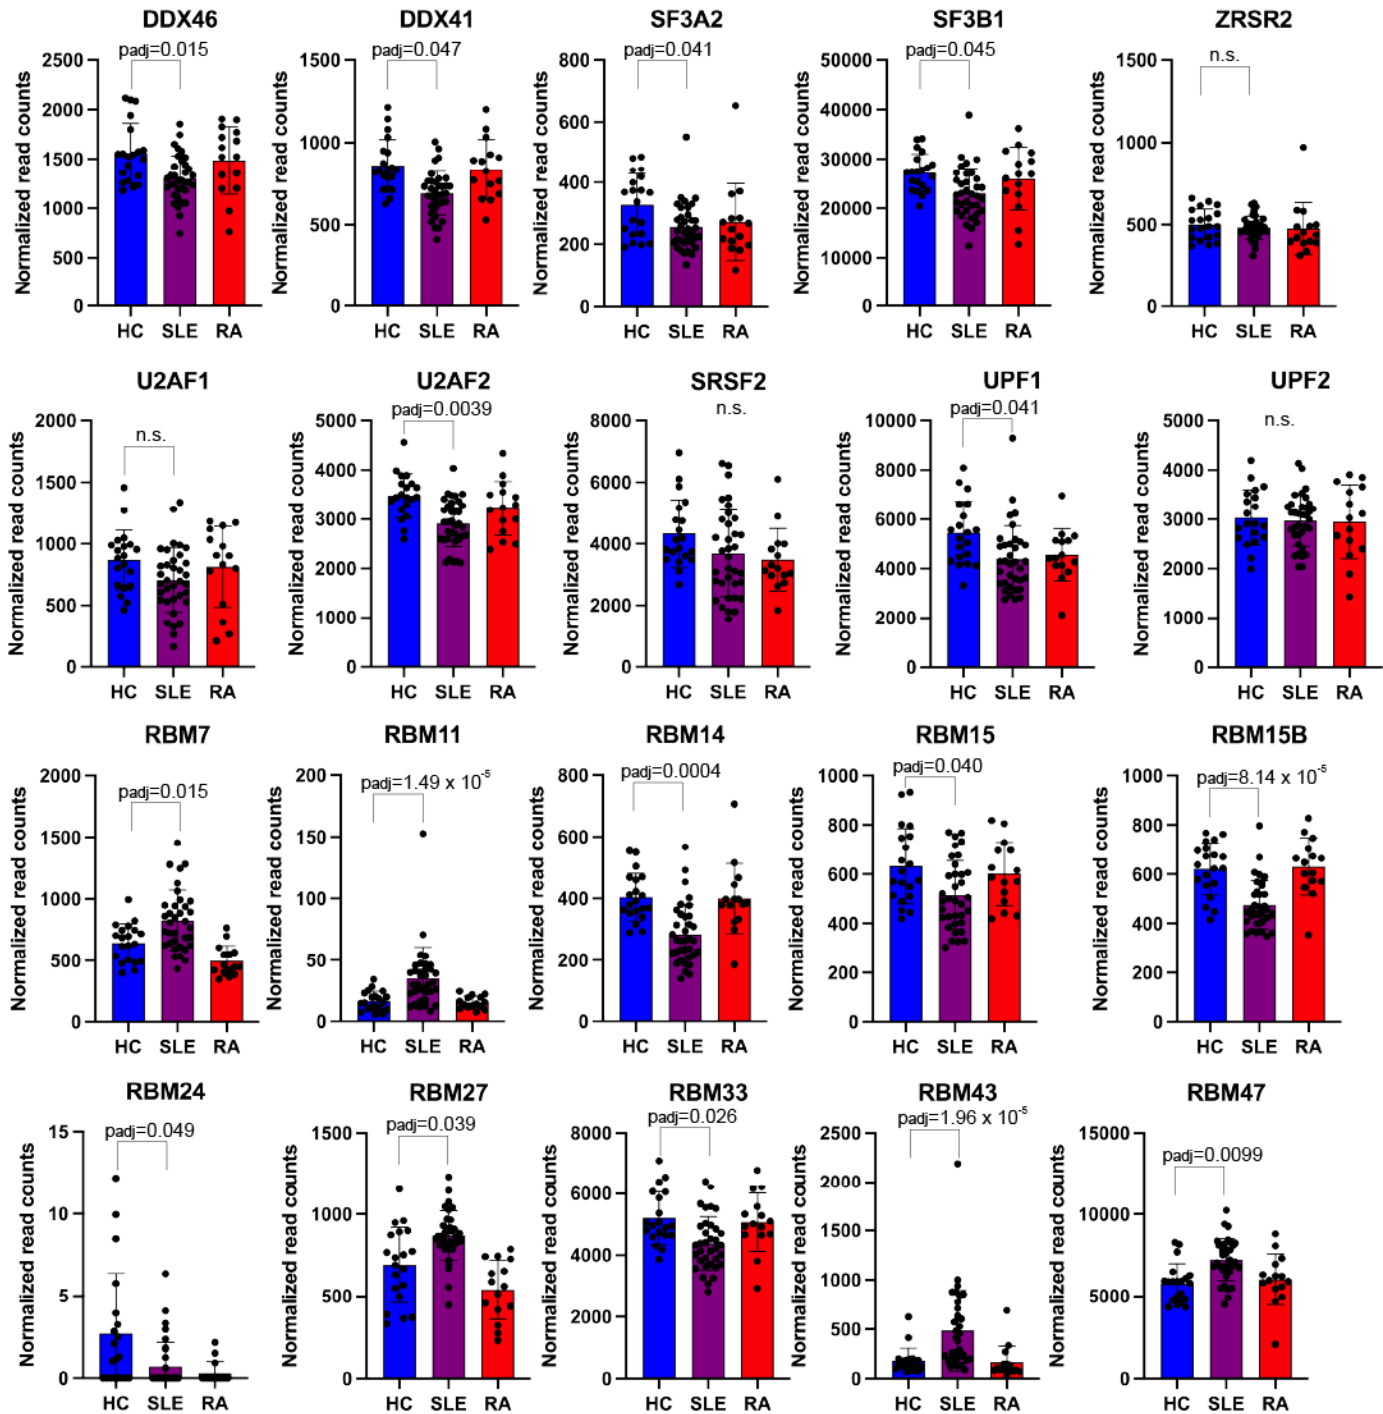

**Suppl. Fig. S5 | Expression by normalized read counts of core spliceosome components and statistically significantly altered genes splicing factors.** Statistical significance was calculated with the binomial function and corrected for multiple comparisons.
